# Supplementary material for: Advancing the integration of multi‐marker metabarcoding data in dietary analysis of trophic generalists
Source: PubMed Central journal article supplement (PMC6899665; doi:10.1111/1755-0998.13060), 2019-08-26
Supplement: MEN-19-1420-s001.pdf [file MEN-19-1420-s001.pdf]

# MOLECULAR ECOLOGY RESOURCES

Supplemental Information for:

*Advancing the integration of multi-marker metabarcoding data in dietary analysis of trophic generalists*

Luis P. da Silva, Vanessa A. Mata, Pedro B. Lopes, Paulo Pereira, Simon N. Jarman, Ricardo J. Lopes, Pedro Beja

## Table of Contents:

|                  |        |
|------------------|--------|
| <b>Figure S1</b> | Page 2 |
| <b>Table S1</b>  | Page 3 |
| <b>Table S2</b>  | Page 4 |
| <b>Table S3</b>  | Page 5 |

# MOLECULAR ECOLOGY RESOURCES

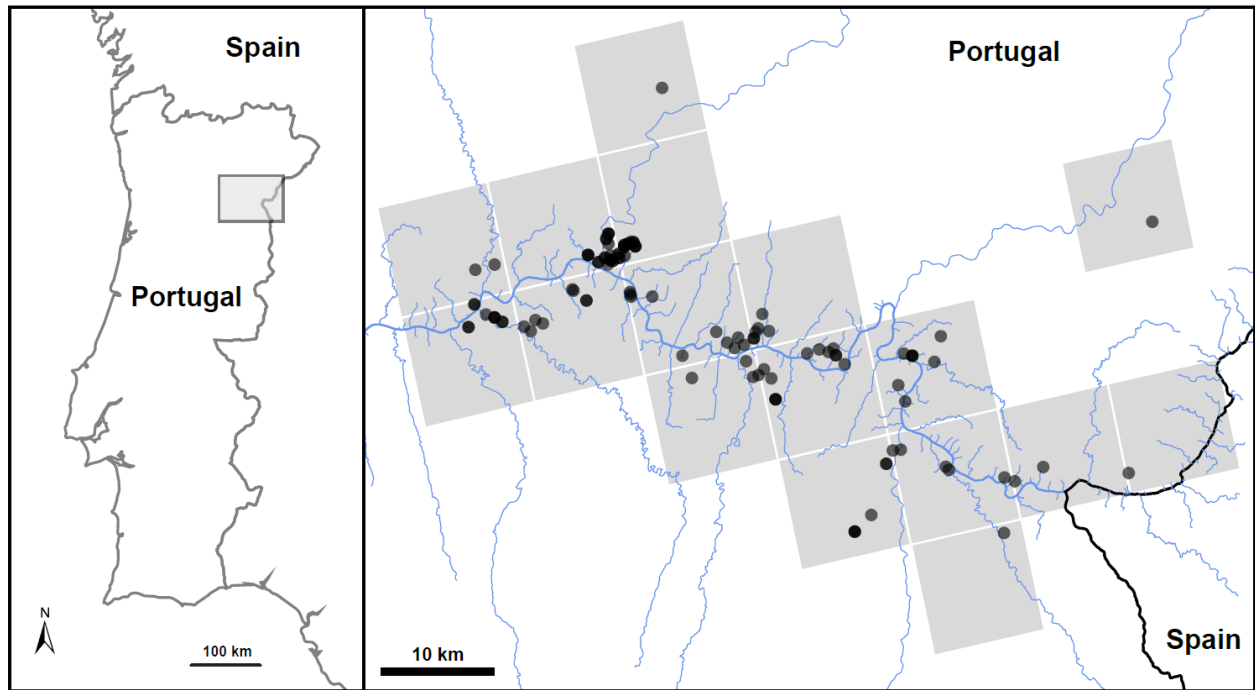

Figure S1 – Black Wheatear distribution along the Douro valley in Portugal (10 km<sup>2</sup> grey squares in ETRS89 projection) and the sample collection points.

# MOLECULAR ECOLOGY RESOURCES

Table S2 – Multiple comparison of taxa and order diversity among different diet assessment methods and molecular markers. Significant values are highlighted in bold.

|            | Group  | Comparison          | Estimate | Std. error | z-value | p-value        |
|------------|--------|---------------------|----------|------------|---------|----------------|
| No. Taxa   | Plant  | morph – 18S         | -1.0986  | 0.1308     | -8.397  | < <b>0.001</b> |
|            |        | morph – <i>trnL</i> | 1.8867   | 0.1216     | 15.517  | < <b>0.001</b> |
|            |        | 18S – <i>trnL</i>   | 0.7881   | 0.0789     | 9.988   | < <b>0.001</b> |
|            |        | multi – 18S         | 0.8979   | 0.0772     | 11.631  | < <b>0.001</b> |
|            |        | multi – <i>trnL</i> | -0.1099  | 0.0604     | -1.818  | 0.207          |
|            | Animal | morph – 18S         | 0.44944  | 0.08692    | 5.171   | < <b>0.001</b> |
|            |        | morph – IN16STK     | -0.48801 | 0.06891    | -7.082  | < <b>0.001</b> |
|            |        | morph – ZBJ         | 0.15373  | 0.07393    | 2.079   | 0.225          |
|            |        | 18S – IN16STK       | 0.93745  | 0.08011    | 11.701  | < <b>0.001</b> |
|            |        | 18S – ZBJ           | 0.60317  | 0.08447    | 7.141   | < <b>0.001</b> |
|            |        | IN16STK – ZBJ       | -0.33429 | 0.0658     | -5.081  | < <b>0.001</b> |
|            |        | multi – 18S         | 1.4240   | 0.0755     | 18.867  | < <b>0.001</b> |
|            |        | multi – IN16STK     | 0.4865   | 0.0539     | 9.029   | < <b>0.001</b> |
|            |        | multi – ZBJ         | -0.8208  | 0.0601     | -13.647 | < <b>0.001</b> |
| No. Orders | Plant  | morph – 18S         | -1.02217 | 0.13287    | -7.693  | < <b>0.001</b> |
|            |        | morph – <i>trnL</i> | 1.66501  | 0.12425    | 13.4    | < <b>0.001</b> |
|            |        | 18S – <i>trnL</i>   | 0.64284  | 0.08442    | 7.614   | < <b>0.001</b> |
|            |        | multi – 18S         | 0.7521   | 0.0823     | 9.137   | < <b>0.001</b> |
|            |        | multi – <i>trnL</i> | -0.1093  | 0.0678     | -1.613  | 0.320          |
|            | Animal | morph – 18S         | 0.08791  | 0.10176    | 0.864   | 1.000          |
|            |        | morph – IN16STK     | -0.49385 | 0.08928    | -5.531  | < <b>0.001</b> |
|            |        | morph – ZBJ         | 0.32294  | 0.09238    | 3.496   | <b>0.003</b>   |
|            |        | 18S – IN16STK       | 0.58176  | 0.0918     | 6.338   | < <b>0.001</b> |
|            |        | 18S – ZBJ           | 0.41086  | 0.09481    | 4.333   | < <b>0.001</b> |
|            |        | IN16STK – ZBJ       | -0.17091 | 0.08127    | -2.103  | 0.212          |
|            |        | multi – 18S         | 1.0411   | 0.0853     | 12.210  | < <b>0.001</b> |
|            |        | multi – IN16STK     | 0.4594   | 0.0700     | 6.562   | < <b>0.001</b> |
|            |        | multi – ZBJ         | -0.6303  | 0.0739     | -8.530  | < <b>0.001</b> |

# MOLECULAR ECOLOGY RESOURCES

Table S3 - Multivariate Generalized Linear Models univariate comparisons among plant orders. Significant values are highlighted in bold.

| Order          | morphological vs markers |              | markers vs multi-marker |              |
|----------------|--------------------------|--------------|-------------------------|--------------|
|                | Deviance                 | p-value      | Deviance                | p-value      |
| Asparagales    | 2.206                    | 0.603        | 1.631                   | 0.985        |
| Poales         | 19.934                   | <b>0.001</b> | 12.749                  | <b>0.027</b> |
| Apiales        | 9.731                    | <b>0.040</b> | 0.388                   | 0.985        |
| Asterales      | 101.287                  | <b>0.001</b> | 18.261                  | <b>0.003</b> |
| Boraginales    | 2.449                    | 0.603        | 0.553                   | 0.985        |
| Brassicales    | 14.518                   | <b>0.004</b> | 4.999                   | 0.740        |
| Caryophyllales | 34.946                   | <b>0.001</b> | 34.999                  | <b>0.001</b> |
| Dipsacales     | 4.394                    | 0.418        | 3.243                   | 0.940        |
| Ericales       | 4.394                    | 0.418        | 3.243                   | 0.940        |
| Fabales        | 20.673                   | <b>0.001</b> | 4.637                   | 0.740        |
| Fagales        | 20.334                   | <b>0.001</b> | 16.171                  | <b>0.006</b> |
| Gentianales    | 6.655                    | 0.149        | 4.93                    | 0.740        |
| Geraniales     | 6.591                    | 0.159        | 4.865                   | 0.740        |
| Lamiales       | 57.754                   | <b>0.001</b> | 31.347                  | <b>0.001</b> |
| Malpighiales   | 14.461                   | <b>0.004</b> | 7.305                   | 0.324        |
| Malvales       | 9.749                    | <b>0.040</b> | 2.657                   | 0.940        |
| Myrtales       | 2.197                    | 0.603        | 1.622                   | 0.985        |
| Ranunculales   | 4.394                    | 0.418        | 3.243                   | 0.940        |
| Rosales        | 23.359                   | <b>0.001</b> | 2.894                   | 0.940        |
| Santalales     | 5.982                    | 0.192        | 2.717                   | 0.940        |
| Sapindales     | 10.996                   | <b>0.024</b> | 1.725                   | 0.985        |
| Saxifragales   | 27.293                   | <b>0.001</b> | 20.401                  | <b>0.001</b> |
| Solanales      | 6.239                    | 0.192        | 7.089                   | 0.327        |
| Vitales        | 108.044                  | <b>0.001</b> | 4.702                   | 0.740        |
| Zygophyllales  | 2.197                    | 0.603        | 1.622                   | 0.985        |
| Pinales        | 17.401                   | <b>0.002</b> | 9.151                   | 0.137        |
| Polypodiales   | 6.591                    | 0.149        | 4.865                   | 0.740        |

# MOLECULAR ECOLOGY RESOURCES

Table S4 – Multivariate Generalized Linear Models univariate comparisons among animal orders. Significant values are highlighted in bold.

| Order             | morphological vs markers |              | markers vs multi-marker |              |
|-------------------|--------------------------|--------------|-------------------------|--------------|
|                   | Deviance                 | p-value      | Deviance                | p-value      |
| Acariformes       | 2.772                    | 0.91         | 2.772                   | 0.979        |
| Araneae           | 23.783                   | <b>0.002</b> | 41.289                  | <b>0.001</b> |
| Sarcoptiformes    | 11.09                    | 0.062        | 11.09                   | 0.143        |
| Trombidiformes    | 13.862                   | <b>0.024</b> | 13.862                  | <b>0.030</b> |
| Lithobiomorpha    | 8.38                     | 0.239        | 8.401                   | 0.413        |
| Scolopendromorpha | 2.772                    | 0.896        | 1.53                    | 0.979        |
| Haplotaxida       | 2.772                    | 0.910        | 2.772                   | 0.979        |
| Julida            | 11.228                   | 0.054        | 9.933                   | 0.229        |
| Pulmonata         | 2.772                    | 0.910        | 2.772                   | 0.979        |
| Archaeognatha     | 8.858                    | 0.228        | 7.584                   | 0.519        |
| Blattodea         | 0.541                    | 0.950        | 0.68                    | 0.979        |
| Coleoptera        | 12.934                   | <b>0.040</b> | 37.884                  | <b>0.001</b> |
| Dermaptera        | 8.317                    | 0.239        | 7.022                   | 0.592        |
| Diptera           | 97.8                     | <b>0.001</b> | 130.311                 | <b>0.001</b> |
| Embioptera        | 22.18                    | <b>0.002</b> | 22.18                   | <b>0.001</b> |
| Hemiptera         | 18.272                   | <b>0.003</b> | 34.36                   | <b>0.001</b> |
| Hymenoptera       | 190.467                  | <b>0.001</b> | 180.358                 | <b>0.001</b> |
| Isoptera          | 5.545                    | 0.557        | 5.623                   | 0.787        |
| Lepidoptera       | 160.152                  | <b>0.001</b> | 138.303                 | <b>0.001</b> |
| Mantodea          | 8.72                     | 0.239        | 5.094                   | 0.864        |
| Neuroptera        | 8.538                    | 0.239        | 4.232                   | 0.977        |
| Odonata           | 8.317                    | 0.239        | 8.317                   | 0.413        |
| Orthoptera        | 78.267                   | <b>0.001</b> | 52.062                  | <b>0.001</b> |
| Phasmatodea       | 2.772                    | 0.910        | 1.726                   | 0.979        |
| Psocoptera        | 2.772                    | 0.910        | 2.772                   | 0.979        |
| Zygentoma         | 4.498                    | 0.851        | 3.314                   | 0.979        |
| Isopoda           | 21.577                   | <b>0.003</b> | 19.208                  | <b>0.001</b> |
| Squamata          | 9.445                    | 0.151        | 11.255                  | 0.125        |
